# Supplementary material
Source: PubMed Central journal article supplement (PMC7418342)

Supplemental Figures for:  
The MIMIC study: Prognostic role and cut-off definition of Monocyte-to-lymphocyte ratio and LDH levels in Metastatic Colorectal cancer  
Debora Basile et al.

**Figure S1. ROC curve**

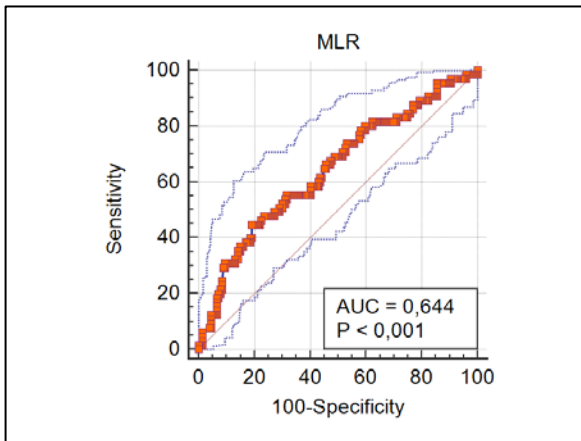

ROC curve to identify MLR cutoff, established as 0.49  
*AUC: area under curve*

Figure S2. Validation cohort: MLR, LDH, MLR and LDH combination

A.

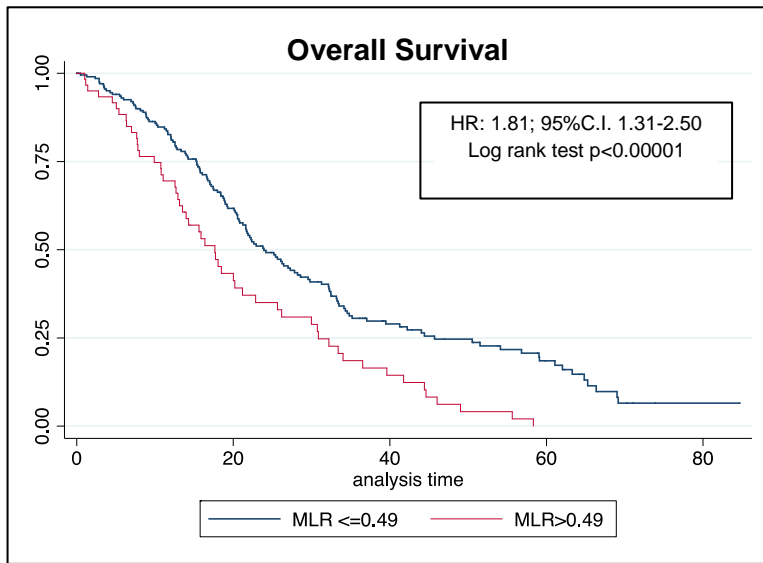

B.

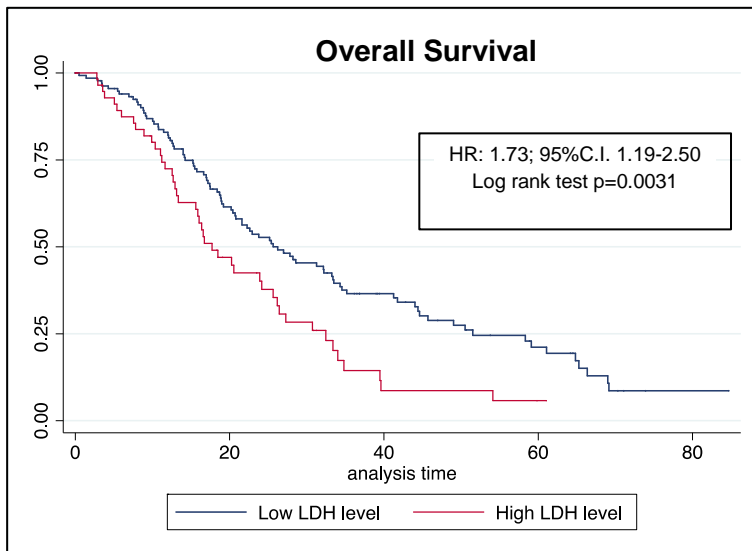

C.

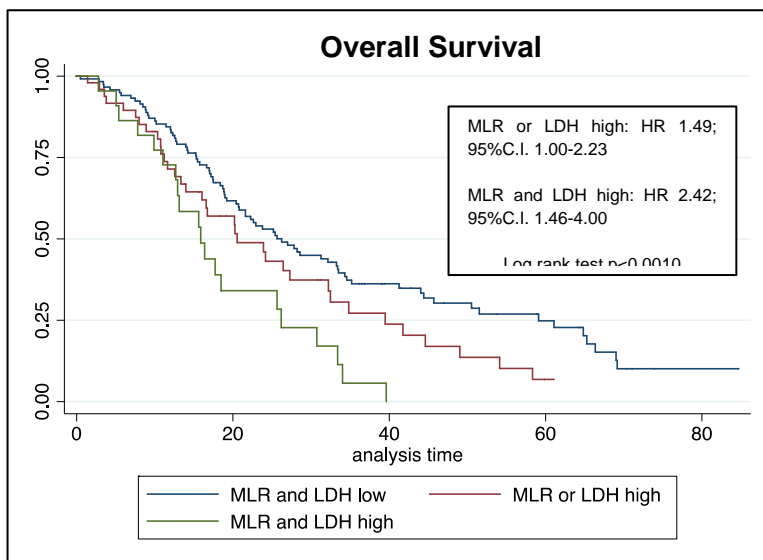

**Figure S3. Subgroup analysis (MLR)**

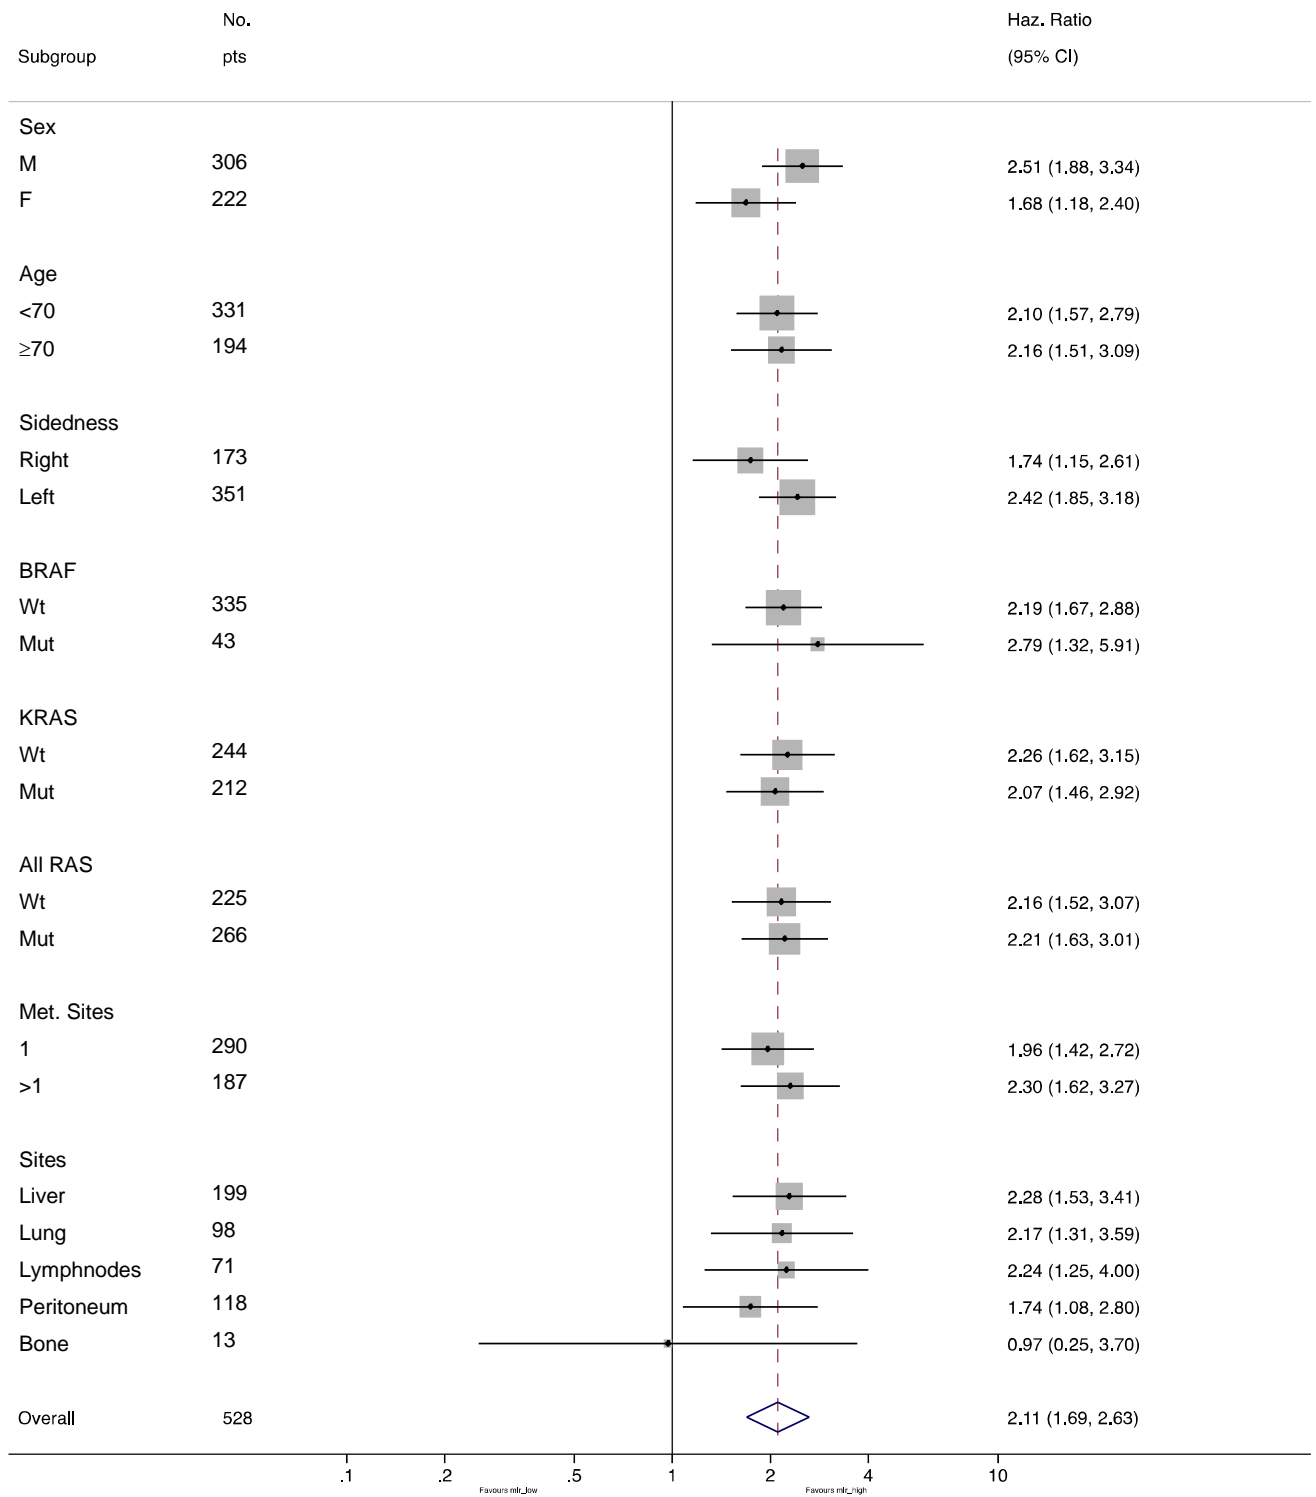

**Figure S4. Subgroup analysis (MLR and LDH combination)**

**A. MLR and LDH high vs MLR or LDH low**

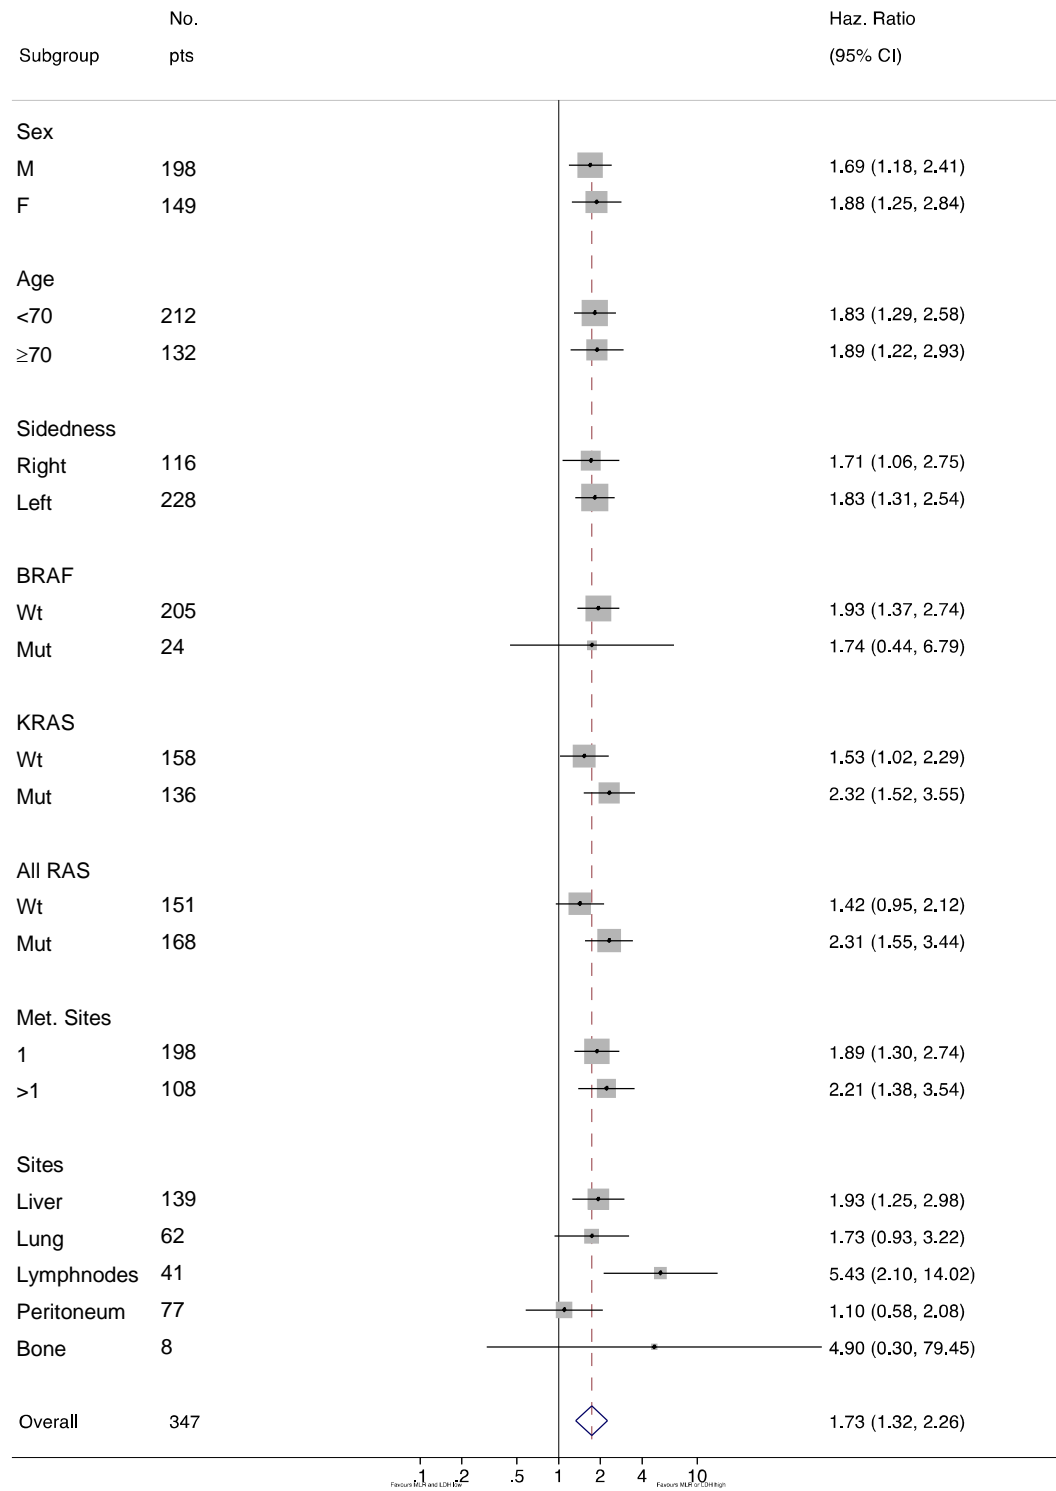

## B. MLR and LDH high vs MLR or LDH high

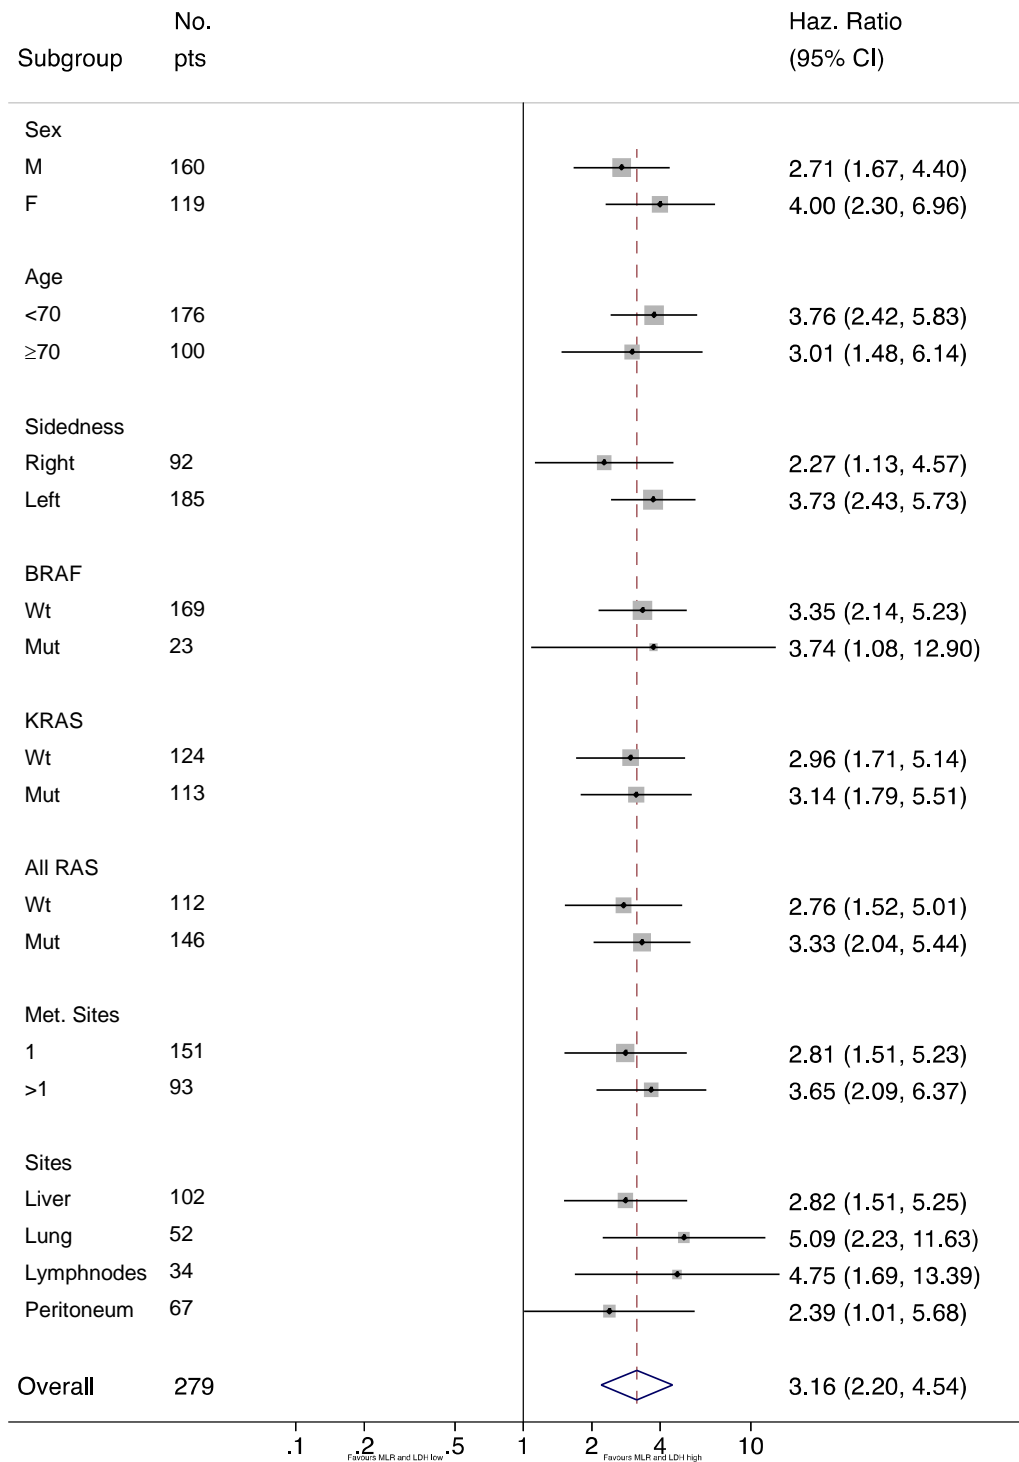

Supplement: ONCO-25-661-s001.pdf [file ONCO-25-661-s001.pdf]
