# Supplementary material
Source: PubMed Central journal article supplement (PMC7418342)
Supplement: ONCO-25-661-s002.pdf [file ONCO-25-661-s002.pdf]

Supplemental Tables for:  
 The MIMIC study: Prognostic role and cut-off definition of Monocyte-to-lymphocyte ratio and LDH levels in Metastatic Colorectal cancer  
 Debora Basile et al.

**Table S1. Baseline characteristics in training and validation cohort**

| Variables                               | Training Set<br>(N 264) | Validation Set<br>(N 264) | P value |
|-----------------------------------------|-------------------------|---------------------------|---------|
| <b>Age</b>                              |                         |                           |         |
| • ≤70                                   | 156                     | 175                       | 0.097   |
| • >70                                   | 106                     | 88                        |         |
| <b>Sex</b>                              |                         |                           |         |
| • Male                                  | 150                     | 114                       | 0.597   |
| • Female                                | 156                     | 108                       |         |
| <b>Sidedness</b>                        |                         |                           |         |
| • Right                                 | 92                      | 81                        | 0.337   |
| • Left                                  | 171                     | 180                       |         |
| <b>Primary tumor resection</b>          |                         |                           |         |
| • No                                    | 71                      | 83                        | 0.251   |
| • Yes                                   | 193                     | 181                       |         |
| <b>Number of metastatic sites</b>       |                         |                           |         |
| • 1                                     | 142                     | 148                       | 0.463   |
| • >1                                    | 98                      | 89                        |         |
| <b>Metastatic sites</b>                 |                         |                           |         |
| • Liver                                 | 95                      | 104                       | 0.910   |
| • Lung                                  | 47                      | 51                        |         |
| • Lymphnodes                            | 34                      | 37                        |         |
| • Peritoneum                            | 63                      | 55                        |         |
| • Bone                                  | 7                       | 6                         |         |
| • Brain                                 | 1                       | 2                         |         |
| <b>KRAS</b>                             |                         |                           |         |
| • Wild Type                             | 125                     | 119                       | 0.243   |
| • Mutated                               | 97                      | 115                       |         |
| <b>BRAF</b>                             |                         |                           |         |
| • Wild Type                             | 158                     | 177                       | 0.621   |
| • Mutated                               | 22                      | 21                        |         |
| <b>NRAS</b>                             |                         |                           |         |
| • Wild Type                             | 164                     | 183                       | 0.396   |
| • Mutated                               | 5                       | 9                         |         |
| <b>ALL RAS</b>                          |                         |                           |         |
| • Wild Type                             | 120                     | 105                       | 0.117   |
| • Mutated                               | 123                     | 143                       |         |
| <b>LDH level</b>                        |                         |                           |         |
| • Under limits                          | 143                     | 134                       | 0.597   |
| • Over limits                           | 55                      | 58                        |         |
| <b>Number of events</b>                 |                         |                           |         |
| • Censored                              | 78                      | 69                        | 0.382   |
| • Uncensored                            | 186                     | 195                       |         |
| <b>Median number of treatment lines</b> | 2.10                    | 2.11                      | 0.503   |
| <b>Median MLR</b>                       | 0.41                    | 0.392                     | 0.362   |

|                  |              |              |       |
|------------------|--------------|--------------|-------|
| <b>Median OS</b> | 22.59 months | 22.09 months | 0.618 |
|------------------|--------------|--------------|-------|

**Table S2. Univariate analysis-Training cohort**

| Univariate analysis                                                                                |                                    |                                                   |                                       |
|----------------------------------------------------------------------------------------------------|------------------------------------|---------------------------------------------------|---------------------------------------|
| Variables                                                                                          | HR                                 | 95% CI                                            | P                                     |
| <b>Age</b><br>• $\geq 70$ vs. $70$                                                                 | <b>1.53</b>                        | <b>1.14-2.05</b>                                  | <b>0.004</b>                          |
| <b>Sex</b><br>• Female vs Male                                                                     | <b>0.85</b>                        | <b>0.63-1.14</b>                                  | <b>0.297</b>                          |
| <b>Sidness</b><br>• Left vs Right                                                                  | <b>0.62</b>                        | <b>0.46-0.84</b>                                  | <b>0.002</b>                          |
| <b>Surgery of primary tumor</b><br>• Yes vs No                                                     | <b>0.37</b>                        | <b>0.27-0.51</b>                                  | <b>&lt;0.001</b>                      |
| <b>Pattern of metastasis</b><br>• Lung vs Liver<br>• Lymph-nodes vs Liver<br>• Peritoneum vs Liver | 1.01<br><b>1.83</b><br><b>1.48</b> | 0.66-1.54<br><b>1.15-2.90</b><br><b>1.01-2.16</b> | 0.936<br><b>0.010</b><br><b>0.041</b> |
| <b>KRAS</b><br>• Mutated vs WT                                                                     | 1.21                               | 0.88-1.66                                         | 0.234                                 |
| <b>BRAF</b><br>• Mutated vs WT                                                                     | <b>1.77</b>                        | <b>1.07-2.92</b>                                  | <b>0.025</b>                          |
| <b>MLR</b><br>Continuous variable                                                                  | <b>3.25</b>                        | <b>2.11-5.02</b>                                  | <b>&lt;0.001</b>                      |
| <b>MLR</b><br>• $\geq 0.49$ vs $<0.49$                                                             | <b>2.44</b>                        | <b>1.79-3.34</b>                                  | <b>&lt;0.001</b>                      |
| <b>LDH</b><br>• High vs low                                                                        | <b>2.10</b>                        | <b>1.47-2.98</b>                                  | <b>&lt;0.001</b>                      |
| <b>NLR</b><br>• Continuous variable                                                                | <b>1.01</b>                        | <b>1.01-1.02</b>                                  | <b>&lt;0.001</b>                      |
| <b>MLR and LDH combination</b><br>• MLR or LDH high vs low<br>• MLR and LDH high vs low            | 1.98<br>3.91                       | 1.38-2.86<br>2.34-6.53                            | <0.001<br><0.001                      |

*\*Bold values are statistically significant*
